# Supplementary material for: NMN alleviates cognitive impairment in Alzheimer's disease by regulating the gut microbiota through the Nrf2/HO-1 pathway
Source: Research Square preprint supplement (doi:10.21203/rs.3.rs-7928145/v1), 2025-11-14
Supplement: Supplementary file 2 [file 93c283d9cf7827cd5b0feeec.pdf]

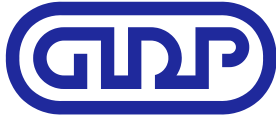

## Confirmation of Publication and Licensing Rights

BioGDP Account ID: 1332027744@qq.com  
Agreement number: GDP2025R24Q4M

To whom this may concern,

This document is to confirm that **Yangzhen Zang** from **Department of Gastroenterology, Wenzhou People's Hospital, The Third Clinical Institute Affiliated to Wenzhou Medical University, Wenzhou, Zhejiang, China** has been granted a license to use the BioGDP content, including graphics, templates and other original artwork, appearing in the attached completed graphic pursuant to BioGDP's Academic License Terms. This license permits BioGDP content to be sublicensed for use in **Molecular Neurobiology** publications.

All rights and ownership of BioGDP content are reserved by BioGDP. All completed graphics must be accompanied by the following citation: "Created with biogdp.com".

BioGDP content included in the completed graphic is not licensed for any commercial uses beyond publication in a journal. For any commercial use of this figure, users may contact BioGDP Support at [gdp-coloring@outlook.com](mailto:gdp-coloring@outlook.com).

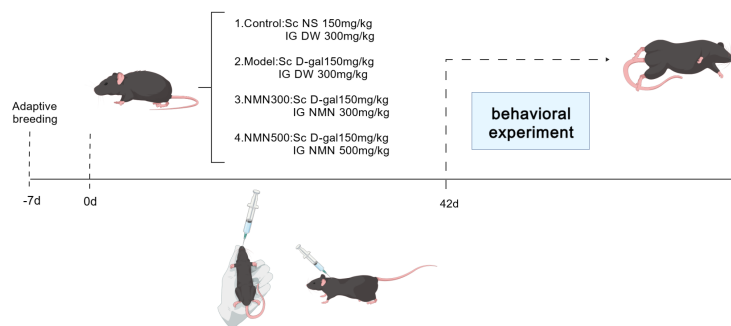

For any questions regarding this document, or other questions about publishing with BioGDP please contact BioGDP Support at [gdp-coloring@outlook.com](mailto:gdp-coloring@outlook.com).
