# Supplementary figures and images for: NMN alleviates cognitive impairment in Alzheimer's disease by regulating the gut microbiota through the Nrf2/HO-1 pathway
Source: Research Square preprint supplement (doi:10.21203/rs.3.rs-7928145/v1), 2025-11-14

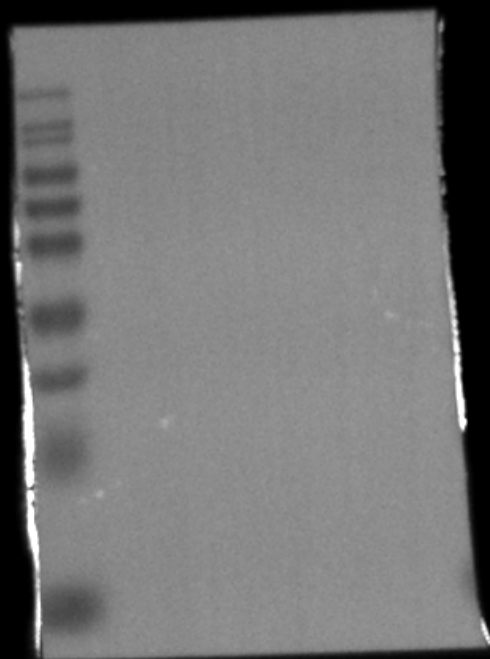

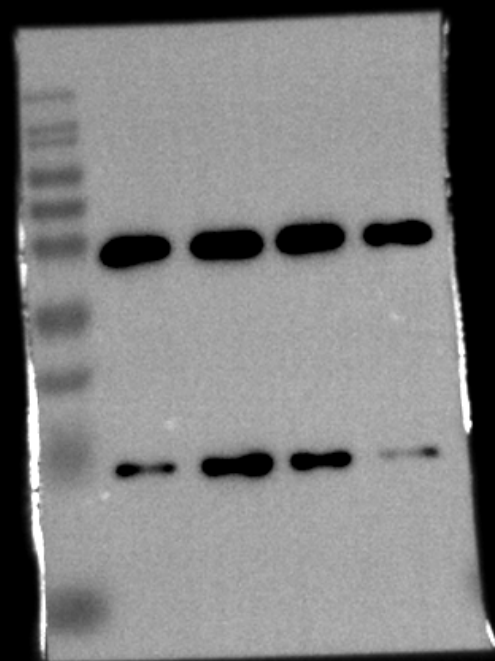

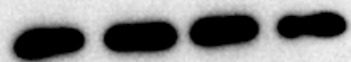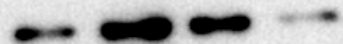

Supplement: Supplementary file 1 [file 2755bdbbec82ad9fbdbb6a62.pdf]
